# Supplementary material for: The Role of Copper (II) on Kininogen Binding to Tropomyosin in the Presence of a Histidine–Proline-Rich Peptide
Source: PubMed Central journal article supplement (PMC7762548; doi:10.3390/ijms21249343), 2020-12-08
Supplement: ijms-21-09343-s001.pdf [file ijms-21-09343-s001.pdf]

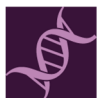

# Copper Affects Binding to Tropomyosin of Peptides Derived from Histidine-Proline-Rich Glycoprotein

Anna Maria Santoro <sup>1</sup>, Stefania Zimbone <sup>1</sup>, Antonio Magri <sup>1</sup>, Diego La Mendola <sup>2,\*</sup>  
and Giulia Grasso <sup>1,\*</sup>

<sup>1</sup> CNR Istituto di Cristallografia Sede Secondaria di Catania, Via Gaifami 18, 95126 Catania, Italy; annamaria.santoro@cnr.it (A.M.S.); stefania\_zimbone@libero.it (S.Z.); antonio.magri@cnr.it;

<sup>2</sup> Dipartimento di Farmacia, Università di Pisa, Via Bonanno Pisano 6, 56126 Pisa, Italy;

\* Correspondence: lamendola@farm.unipi.it (D.L.); giulia.grasso@cnr.it (G.G.)

**Table S1.** Protonation constants ( $\log \beta$ ) TetraHPRG (L) (T = 298 K)<sup>a</sup>.

| Species          | $\log \beta$ | pK         |
|------------------|--------------|------------|
| LH               | 7.49 (5)     | 7.49       |
| LH <sub>2</sub>  | 14.65 (4)    | 7.16       |
| LH <sub>3</sub>  | 21.29 (9)    | 6.91       |
| LH <sub>4</sub>  | 28.20 (2)    | 6.63       |
| LH <sub>6</sub>  | 40.88 (2)    | (6.34 x 2) |
| LH <sub>8</sub>  | 52.52 (3)    | (5.83 x 2) |
| LH <sub>9</sub>  | 57.96 (6)    | 5.44       |
| LH <sub>10</sub> | 63.24 (6)    | 5.28       |
| LH <sub>11</sub> | 68.59 (3)    | 5.35       |
| LH <sub>12</sub> | 73.15 (2)    | 4.55       |

<sup>a</sup> Standard deviation ( $3\sigma$  values) are given in parenthesis. The charges are omitted for clarity [27].

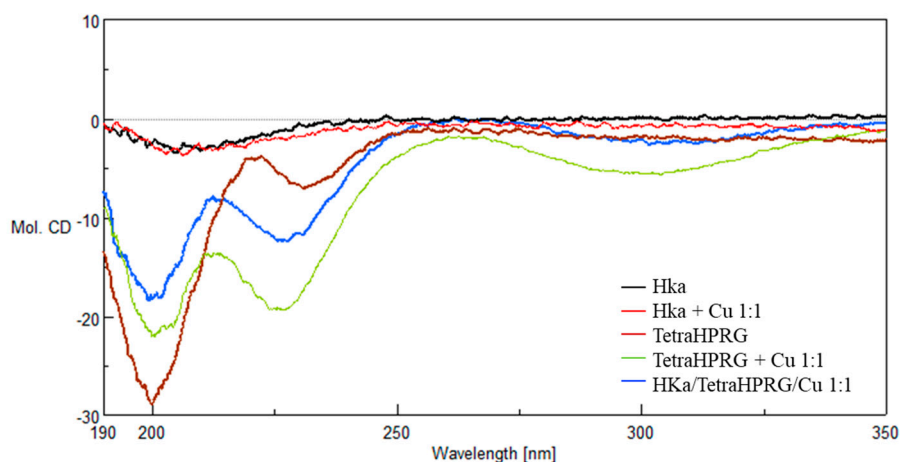

**Figure S1.** CD spectra of a) copper(II) complexes with Hka, TetraHPRG and ternary systems (Hka/TetraHPRG/Cu<sup>2+</sup> in water (pH=7), at different mol equivalent of metal (metal to ligand molar ratio is 1:1; [L]=1×10<sup>-5</sup> M).

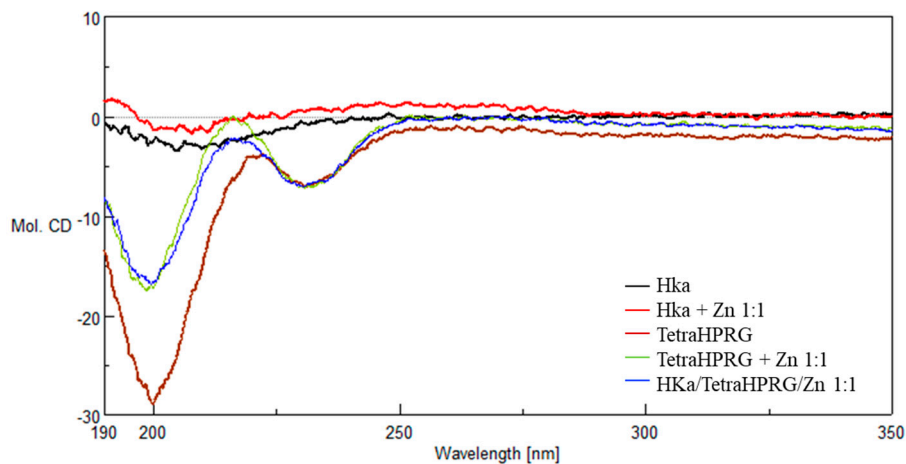

**Figure S2.** CD spectra of a) copper (II) complexes with Hka, TetraHPRG and ternary systems (Hka/TetraHPRG/Cu (II)) in water (pH=7), at different mol equivalent of metal (metal to ligand molar ratio is 1:1;  $[L]=1 \times 10^{-5}$  M).

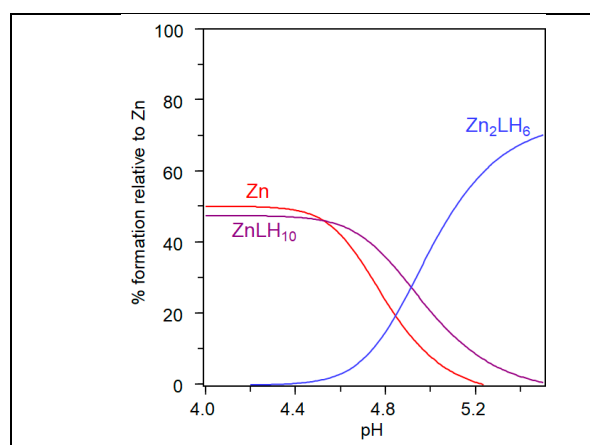

**Figure S3.** Species distribution diagram for the  $Zn^{2+}$  complexes with TetraHPRG with M/L molar ratio from 1:1 to 2:1.  $[Zn^{2+}] = 1 \times 10^{-3}$  M.
